# Supplementary material for: ‘Mom—I don’t want to hear it’: Brain response to maternal praise and criticism in adolescents with major depressive disorder
Source: PubMed Central journal article supplement — Soc Cogn Affect Neurosci. 2017 Feb 17;12(5):729–38. doi: 10.1093/scan/nsx014 (PMC5460041; doi:10.1093/scan/nsx014), 2017-02-17
Supplement: nsx014_supp.pdf [file nsx014_supp.pdf]

## Supplemental tables and figures

Table S1. ANOVA and pairwise comparisons in brain regions showing a significant group X condition (criticism vs. neutral) interaction

| Brain region                           | BA           | Temporal regions:<br>significant<br>group X condition | Repeated measures group x condition ANOVA                                                | Pairwise comparisons                        |                                              |
|----------------------------------------|--------------|-------------------------------------------------------|------------------------------------------------------------------------------------------|---------------------------------------------|----------------------------------------------|
|                                        |              |                                                       |                                                                                          | MDD<br>(criticism vs. neutral)              | CON<br>(criticism vs. neutral)               |
| L Superior Parietal Lobe               | 7            | 15.03 ~ 30.06                                         | Huynh-Feldt $F(1, 46) = 10.37, p = .002, \text{partial } \eta^2 = .18$                   | $t(19) = 2.439, p = .025$                   | $t(27) = -1.853, p = .075$                   |
| R Postcentral Gyrus                    | 5            | 10.02 ~ 15.03                                         | Huynh-Feldt $F(1, 46) = 5.28, p = .026, \text{partial } \eta^2 = .10$                    | $t(19) = 1.085, p = .291$                   | $t(27) = -2.553, p = .017$                   |
|                                        |              | 23.38 ~ 30.06                                         | Huynh-Feldt $F(1, 46) = 8.00, p = .007, \text{partial } \eta^2 = .15$                    | $t(19) = 2.314, p = .032$                   | $t(27) = -1.338, p = .192$                   |
| L Postcentral Gyrus                    | 6            | 13.36 ~ 26.72                                         | Huynh-Feldt $F(1, 46) = 13.60, p = .001, \text{partial } \eta^2 = .23$                   | $t(19) = 3.089, p = .006$                   | $t(27) = -1.926, p = .065$                   |
| R Postcentral Gyrus                    | 2/40         | 10.02 ~ 18.37                                         | Huynh-Feldt $F(1, 46) = 7.04, p = .011, \text{partial } \eta^2 = .13$                    | $t(19) = 1.706, p = .104$                   | $t(27) = -2.103, p = .045$                   |
|                                        |              | 21.71 ~ 30.06                                         | Huynh-Feldt $F(1, 46) = 8.38, p = .006, \text{partial } \eta^2 = .15$                    | $t(19) = 3.398, p = .003$                   | $t(27) = -.292, p = .773$                    |
| R Precuneus                            | 7            | 20.04 ~ 30.06                                         | Huynh-Feldt $F(1, 46) = 6.93, p = .011, \text{partial } \eta^2 = .13$                    | $t(19) = 2.493, p = .022$                   | $t(27) = -1.090, p = .286$                   |
| R Postcentral Gyrus                    | 3            | 10.02 ~ 20.04                                         | Huynh-Feldt $F(1, 46) = 9.74, p = .003, \text{partial } \eta^2 = .18$                    | $t(19) = 3.726, p = .001$                   | $t(27) = -1.012, p = .321$                   |
|                                        |              | 21.71 ~ 26.72                                         | Huynh-Feldt $F(1, 46) = 5.26, p = .026, \text{partial } \eta^2 = .10$                    | $t(19) = 3.083, p = .006$                   | $t(27) = .729, p = .472$                     |
| R Cingulate Gyrus                      | 31           | 11.69 ~ 20.04                                         | Huynh-Feldt $F(1, 46) = 8.53, p = .005, \text{partial } \eta^2 = .16$                    | $t(19) = .688, p = .500$                    | $t(27) = -4.001, p = .000$                   |
|                                        |              | 21.71 ~ 28.39                                         | Huynh-Feldt $F(1, 46) = 6.33, p = .015, \text{partial } \eta^2 = .12$                    | $t(19) = 1.580, p = .131$                   | $t(27) = -1.998, p = .056$                   |
| L Angular Gyrus/Inferior Parietal Lobe | 39           | 10.02 ~ 30.06                                         | Huynh-Feldt $F(1, 46) = 13.76, p = .001, \text{partial } \eta^2 = .23$                   | $t(19) = 1.766, p = .094$                   | $t(27) = -3.662, p = .001$                   |
| R Medial Frontal Gyrus                 | 10/11        | 25.05 ~ 28.39                                         | Huynh-Feldt $F(1, 46) = 4.91, p = .032, \text{partial } \eta^2 = .10$                    | $t(19) = 2.449, p = .024$                   | $t(27) = -.444, p = .660$                    |
| <b>*L Parahippocampal Gyrus</b>        | <b>35/36</b> | <b>8.35 ~ 30.06</b>                                   | <b>Huynh-Feldt <math>F(1, 46) = 11.78, p = .001, \text{partial } \eta^2 = .20</math></b> | <b><math>t(19) = 2.401, p = .027</math></b> | <b><math>t(27) = -2.928, p = .007</math></b> |
| L Culmen                               |              | 8.35 ~ 16.7                                           | Huynh-Feldt $F(1, 46) = 12.14, p = .001, \text{partial } \eta^2 = .21$                   | $t(19) = 2.478, p = .023$                   | $t(27) = -2.584, p = .015$                   |
| R Culmen                               |              | 6.68 ~ 28.39                                          | Huynh-Feldt $F(1, 46) = 14.58, p = .000, \text{partial } \eta^2 = .24$                   | $t(19) = 2.707, p = .014$                   | $t(27) = -3.156, p = .004$                   |

Note. F value = F value of centroid; R = Right; L = Left;

\*average brain activity across the temporal regions that displayed significant group X condition interactions and time-series in these regions are presented in Figure 1 and Figure S3, respectively. Other regions not consistent with Neurosynth.org brain maps implicated in emotional, memory, social, or self-related processing in the literature.

Table S2. ANOVA and pairwise comparisons in brain regions showing a significant group X condition (praise vs. neutral) interaction

| Brain region                            | BA           | Temporal regions:<br>significant<br>group X condition | Repeated measures group x condition ANOVA                                               | Pairwise comparisons                         |                                              |
|-----------------------------------------|--------------|-------------------------------------------------------|-----------------------------------------------------------------------------------------|----------------------------------------------|----------------------------------------------|
|                                         |              |                                                       |                                                                                         | MDD (praise vs. neutral)                     | CON (praise vs. neutral)                     |
| L Postcentral Gyrus                     | 5            | 21.71 ~ 30.06                                         | Huynh-Feldt $F(1, 46) = 6.50, p = .014, \text{partial } \eta^2 = .12$                   | $t(19) = 3.537, p = .002$                    | $t(27) = .107, p = .916$                     |
| R Superior Parietal Lobule              | 7/40         | 13.36 ~ 20.04                                         | Huynh-Feldt $F(1, 46) = 5.89, p = .019, \text{partial } \eta^2 = .11$                   | $t(19) = -2.898, p = .009$                   | $t(27) = -.007, p = .994$                    |
| L Precentral Gyrus                      | 6            | 21.71 ~ 30.06                                         | Huynh-Feldt $F(1, 46) = 8.65, p = .005, \text{partial } \eta^2 = .16$                   | $t(19) = 3.039, p = .007$                    | $t(27) = -.968, p = .341$                    |
| <b>*Precuneus</b>                       | <b>7</b>     | <b>15.03 ~ 18.37</b>                                  | <b>Huynh-Feldt <math>F(1, 46) = 4.45, p = .04, \text{partial } \eta^2 = .09</math></b>  | <b><math>t(19) = -4.039, p = .001</math></b> | <b><math>t(27) = -1.431, p = .164</math></b> |
| R Inferior Frontal Gyrus                | 44/45        | 25.05 ~ 30.06                                         | Huynh-Feldt $F(1, 46) = 11.05, p = .002, \text{partial } \eta^2 = .19$                  | $t(19) = 2.627, p = .017$                    | $t(27) = -2.070, p = .048$                   |
| R Middle Occipital Gyrus                | 19           | 21.71 ~ 28.39                                         | Huynh-Feldt $F(1, 46) = 6.46, p = .014, \text{partial } \eta^2 = .12$                   | $t(19) = 2.325, p = .031$                    | $t(27) = -.936, p = .358$                    |
| R Cuneus                                | 18/17        | 11.69 ~ 16.7                                          | Huynh-Feldt $F(1, 46) = 5.43, p = .024, \text{partial } \eta^2 = .11$                   | $t(19) = -2.490, p = .022$                   | $t(27) = .348, p = .731$                     |
| <b>*R Thalamus extending to Caudate</b> | <b>-</b>     | <b>3.34 ~ 10.02</b>                                   | <b>Huynh-Feldt <math>F(1, 46) = 9.04, p = .004, \text{partial } \eta^2 = .16</math></b> | <b><math>t(19) = -3.841, p = .001</math></b> | <b><math>t(27) = -1.199, p = .843</math></b> |
|                                         |              | <b>13.36 ~ 20.04</b>                                  | <b>Huynh-Feldt <math>F(1, 46) = 7.43, p = .009, \text{partial } \eta^2 = .14</math></b> | <b><math>t(19) = -3.673, p = .002</math></b> | <b><math>t(27) = .250, p = .804</math></b>   |
| L Lingual Gyrus                         | 17/18        | 23.38 ~ 26.72                                         | Huynh-Feldt $F(1, 46) = 5.20, p = .027, \text{partial } \eta^2 = .10$                   | $t(19) = 2.247, p = .037$                    | $t(27) = -.533, p = .598$                    |
| Subgenual ACC extending to Caudate      | 25           | 18.37 ~ 25.05                                         | Huynh-Feldt $F(1, 46) = 6.93, p = .012, \text{partial } \eta^2 = .13$                   | $t(19) = 1.726, p = .101$                    | $t(27) = -1.958, p = .061$                   |
| <b>*R Parahippocampal Gyrus</b>         | <b>37</b>    | <b>3.34 ~ 8.35</b>                                    | <b>Huynh-Feldt <math>F(1, 46) = 5.80, p = .020, \text{partial } \eta^2 = .11</math></b> | <b><math>t(19) = -2.372, p = .028</math></b> | <b><math>t(27) = .888, p = .382</math></b>   |
| <b>*Medial Prefrontal Cortex</b>        | <b>11/10</b> | <b>13.36 ~ 30.06</b>                                  | <b>Huynh-Feldt <math>F(1, 46) = 8.80, p = .005, \text{partial } \eta^2 = .16</math></b> | <b><math>t(19) = -2.667, p = .015</math></b> | <b><math>t(27) = 1.007, p = .323</math></b>  |
| R Anterior Middle Temporal Gyrus        | 21           | 20.04 ~ 30.06                                         | Huynh-Feldt $F(1, 46) = 8.33, p = .006, \text{partial } \eta^2 = .15$                   | $t(19) = 1.839, p = .082$                    | $t(27) = -2.378, p = .025$                   |

Note. F value = F value of centroid; R = Right; L = Left; ACC=Anterior Cingulate Cortex

\*average brain activity across the temporal regions that displayed significant group X condition interactions and time-series in these regions are presented in Figure 2 and Figure S4, respectively. Other regions not consistent with Neurosynth.org brain maps implicated in emotional, memory, social, or self-related processing in the literature.

Table S3. ANOVA and pairwise comparisons in brain regions showing a significant group X condition (criticism vs. neutral) interaction, controlling for anxiety symptoms.

| Brain region                           | BA           | Temporal regions:<br>significant<br>group X condition | Repeated measures group x condition ANOVA                                               | Pairwise comparisons                        |                                              |
|----------------------------------------|--------------|-------------------------------------------------------|-----------------------------------------------------------------------------------------|---------------------------------------------|----------------------------------------------|
|                                        |              |                                                       |                                                                                         | MDD<br>(criticism vs. neutral)              | CON<br>(criticism vs. neutral)               |
| L Superior Parietal Lobe               | 7            | 15.03 ~ 30.06                                         | Huynh-Feldt $F(1, 42) = 6.36, p = .016, \text{partial } \eta^2 = .13$                   | $t(17) = 1.972, p = .065$                   | $t(26) = -1.591, p = .124$                   |
| R Postcentral Gyrus                    | 5            | 10.02 ~ 15.03                                         | Huynh-Feldt $F(1, 42) = 4.68, p = .036, \text{partial } \eta^2 = .10$                   | $t(17) = .909, p = .376$                    | $t(26) = -2.921, p = .007$                   |
|                                        |              | 23.38 ~ 30.06                                         | Huynh-Feldt $F(1, 42) = 10.61, p = .002, \text{partial } \eta^2 = .20$                  | $t(17) = 2.310, p = .034$                   | $t(26) = -1.722, p = .097$                   |
| L Postcentral Gyrus                    | 6            | 13.36 ~ 26.72                                         | Huynh-Feldt $F(1, 42) = 9.92, p = .003, \text{partial } \eta^2 = .19$                   | $t(17) = 3.415, p = .003$                   | $t(26) = -1.899, p = .069$                   |
| R Postcentral Gyrus                    | 2/40         | 10.02 ~ 18.37                                         | Huynh-Feldt $F(1, 42) = 1.50, p = .227, \text{partial } \eta^2 = .04$                   | $t(17) = 1.378, p = .186$                   | $t(26) = -2.162, p = .040$                   |
|                                        |              | 21.71 ~ 30.06                                         | Huynh-Feldt $F(1, 42) = 5.20, p = .028, \text{partial } \eta^2 = .11$                   | $t(17) = 3.497, p = .003$                   | $t(26) = -.446, p = .659$                    |
| R Precuneus                            | 7            | 20.04 ~ 30.06                                         | Huynh-Feldt $F(1, 42) = 7.30, p = .010, \text{partial } \eta^2 = .15$                   | $t(17) = 2.027, p = .059$                   | $t(26) = -.932, p = .360$                    |
| R Postcentral Gyrus                    | 3            | 10.02 ~ 20.04                                         | Huynh-Feldt $F(1, 42) = 4.91, p = .032, \text{partial } \eta^2 = .11$                   | $t(17) = 3.390, p = .003$                   | $t(26) = -1.207, p = .238$                   |
|                                        |              | 21.71 ~ 26.72                                         | Huynh-Feldt $F(1, 42) = 6.89, p = .012, \text{partial } \eta^2 = .14$                   | $t(17) = 2.913, p = .010$                   | $t(26) = .545, p = .591$                     |
| R Cingulate Gyrus                      | 31           | 11.69 ~ 20.04                                         | Huynh-Feldt $F(1, 42) = 1.80, p = .187, \text{partial } \eta^2 = .04$                   | $t(17) = .384, p = .705$                    | $t(26) = -4.118, p = .000$                   |
|                                        |              | 21.71 ~ 28.39                                         | Huynh-Feldt $F(1, 42) = 3.26, p = .078, \text{partial } \eta^2 = .07$                   | $t(17) = 1.369, p = .189$                   | $t(26) = -2.017, p = .054$                   |
| L Angular Gyrus/Inferior Parietal Lobe | 39           | 10.02 ~ 30.06                                         | Huynh-Feldt $F(1, 42) = 10.95, p = .002, \text{partial } \eta^2 = .21$                  | $t(17) = 1.398, p = .180$                   | $t(26) = -3.398, p = .002$                   |
| R Medial Frontal Gyrus                 | 10/11        | 25.05 ~ 28.39                                         | Huynh-Feldt $F(1, 42) = 7.27, p = .010, \text{partial } \eta^2 = .15$                   | $t(17) = 2.429, p = .027$                   | $t(26) = -.444, p = .661$                    |
| <b>*L Parahippocampal Gyrus</b>        | <b>35/36</b> | <b>8.35 ~ 30.06</b>                                   | <b>Huynh-Feldt <math>F(1, 42) = 5.07, p = .030, \text{partial } \eta^2 = .11</math></b> | <b><math>t(17) = 2.238, p = .039</math></b> | <b><math>t(26) = -2.771, p = .010</math></b> |
| L Culmen                               |              | 8.35 ~ 16.7                                           | Huynh-Feldt $F(1, 42) = 4.52, p = .039, \text{partial } \eta^2 = .10$                   | $t(17) = 2.343, p = .032$                   | $t(26) = -2.370, p = .026$                   |
| R Culmen                               |              | 6.68 ~ 28.39                                          | Huynh-Feldt $F(1, 42) = 1.91, p = .174, \text{partial } \eta^2 = .04$                   | $t(17) = 2.203, p = .042$                   | $t(26) = -3.049, p = .005$                   |

Note. F value = F value of centroid; R = Right; L = Left; N= 45 (3 participants missing anxiety symptom data).

\*key region interpreted in paper; other regions not consistent with Neurosynth.org brain maps implicated in emotional, memory, social, or self-related processing in the literature.

Table S4. ANOVA and pairwise comparisons in brain regions showing a significant group X condition (praise vs. neutral) interaction, controlling for anxiety symptoms

| Brain region                            | BA           | Temporal regions:<br>significant<br>group X condition | Repeated measures group x condition ANOVA                                               | Pairwise comparisons                         |                                              |
|-----------------------------------------|--------------|-------------------------------------------------------|-----------------------------------------------------------------------------------------|----------------------------------------------|----------------------------------------------|
|                                         |              |                                                       |                                                                                         | MDD (praise vs. neutral)                     | CON (praise vs. neutral)                     |
| L Postcentral Gyrus                     | 5            | 21.71 ~ 30.06                                         | Huynh-Feldt $F(1, 42) = 4.94, p = .032, \text{partial } \eta^2 = .11$                   | $t(17) = 3.308, p = .004$                    | $t(26) = .129, p = .898$                     |
| R Superior Parietal Lobule              | 7/40         | 13.36 ~ 20.04                                         | Huynh-Feldt $F(1, 42) = 12.14, p = .001, \text{partial } \eta^2 = .22$                  | $t(17) = -3.086, p = .007$                   | $t(26) = .225, p = .823$                     |
| L Precentral Gyrus                      | 6            | 21.71 ~ 30.06                                         | Huynh-Feldt $F(1, 42) = 7.37, p = .010, \text{partial } \eta^2 = .15$                   | $t(17) = 2.916, p = .010$                    | $t(26) = -.448, p = .658$                    |
| <b>*Precuneus</b>                       | <b>7</b>     | <b>15.03 ~ 18.37</b>                                  | <b>Huynh-Feldt <math>F(1, 42) = 7.16, p = .011, \text{partial } \eta^2 = .15</math></b> | <b><math>t(17) = -5.526, p = .000</math></b> | <b><math>t(26) = -1.091, p = .285</math></b> |
| R Inferior Frontal Gyrus                | 44/45        | 25.05 ~ 30.06                                         | Huynh-Feldt $F(1, 42) = 11.14, p = .002, \text{partial } \eta^2 = .21$                  | $t(17) = 2.339, p = .032$                    | $t(26) = -1.791, p = .085$                   |
| R Middle Occipital Gyrus                | 19           | 21.71 ~ 28.39                                         | Huynh-Feldt $F(1, 42) = 8.00, p = .007, \text{partial } \eta^2 = .16$                   | $t(17) = 2.060, p = .055$                    | $t(26) = -.295, p = .770$                    |
| R Cuneus                                | 18/17        | 11.69 ~ 16.7                                          | Huynh-Feldt $F(1, 42) = 1.19, p = .282, \text{partial } \eta^2 = .03$                   | $t(17) = -2.365, p = .030$                   | $t(26) = .947, p = .352$                     |
| <b>*R Thalamus extending to Caudate</b> | -            | <b>3.34 ~ 10.02</b>                                   | <b>Huynh-Feldt <math>F(1, 42) = 9.61, p = .003, \text{partial } \eta^2 = .19</math></b> | <b><math>t(17) = -3.448, p = .003</math></b> | <b><math>t(26) = -1.108, p = .915</math></b> |
|                                         |              | <b>13.36 ~ 20.04</b>                                  | <b>Huynh-Feldt <math>F(1, 42) = 9.06, p = .004, \text{partial } \eta^2 = .18</math></b> | <b><math>t(17) = -3.332, p = .004</math></b> | <b><math>t(26) = .508, p = .616</math></b>   |
| L Lingual Gyrus                         | 17/18        | 23.38 ~ 26.72                                         | Huynh-Feldt $F(1, 42) = 6.85, p = .012, \text{partial } \eta^2 = .14$                   | $t(17) = 1.802, p = .089$                    | $t(26) = -.060, p = .953$                    |
| Subgenual ACC extending to Caudate      | 25           | 18.37 ~ 25.05                                         | Huynh-Feldt $F(1, 42) = 8.53, p = .006, \text{partial } \eta^2 = .17$                   | $t(17) = 1.414, p = .175$                    | $t(26) = -2.037, p = .052$                   |
| <b>*R Parahippocampal Gyrus</b>         | <b>37</b>    | <b>3.34 ~ 8.35</b>                                    | <b>Huynh-Feldt <math>F(1, 42) = 1.02, p = .319, \text{partial } \eta^2 = .02</math></b> | <b><math>t(17) = -2.210, p = .041</math></b> | <b><math>t(26) = 1.228, p = .230</math></b>  |
| <b>*Medial Prefrontal Cortex</b>        | <b>11/10</b> | <b>13.36 ~ 30.06</b>                                  | <b>Huynh-Feldt <math>F(1, 42) = 9.66, p = .003, \text{partial } \eta^2 = .19</math></b> | <b><math>t(17) = -2.734, p = .014</math></b> | <b><math>t(26) = 1.038, p = .309</math></b>  |
| R Anterior Middle Temporal Gyrus        | 21           | 20.04 ~ 30.06                                         | Huynh-Feldt $F(1, 42) = 10.11, p = .003, \text{partial } \eta^2 = .19$                  | $t(17) = 1.859, p = .080$                    | $t(26) = -2.188, p = .038$                   |

Note. F value = F value of centroid; R = Right; L = Left; N= 45 (3 participants missing anxiety symptom data).

\*key region interpreted in paper; other regions not consistent with Neurosynth.org brain maps implicated in emotional, memory, social, or self-related processing in the literature.

Table S5. Bivariate correlations between age and neural activity in response to criticism and praise, for entire sample and by group

| Brain region                           | Neural response to criticism |       |         | Brain region                            | Neural response to praise |       |       |
|----------------------------------------|------------------------------|-------|---------|-----------------------------------------|---------------------------|-------|-------|
|                                        | MDD                          | CON   | ALL     |                                         | MDD                       | CON   | ALL   |
| L Superior Parietal Lobe               | -.345                        | -.036 | -.155   | L Postcentral Gyrus                     | -.144                     | -.175 | -.162 |
| R Postcentral Gyrus                    | -.411                        | -.262 | -.315*  | R Superior Parietal Lobule              | .127                      | -.210 | -.078 |
|                                        | -.490*                       | -.229 | -.332*  | L Precentral Gyrus                      | -.152                     | -.022 | -.074 |
| L Postcentral Gyrus                    | -.215                        | -.151 | -.159   | <b>*Precuneus</b>                       | .108                      | .118  | .102  |
| R Postcentral Gyrus                    | -.411                        | -.230 | -.279   | R Inferior Frontal Gyrus                | .113                      | -.210 | -.079 |
|                                        | -.538*                       | -.322 | -.401** | R Middle Occipital Gyrus                | -.224                     | .121  | -.002 |
| R Precuneus                            | -.358                        | .052  | -.099   | R Cuneus                                | -.357                     | .032  | -.097 |
| R Postcentral Gyrus                    | -.068                        | -.112 | -.094   | <b>*R Thalamus extending to Caudate</b> | <b>.488*</b>              | -.094 | .103  |
|                                        | -.374                        | -.150 | -.205   |                                         | -.084                     | -.240 | -.176 |
| R Cingulate Gyrus                      | .342                         | .111  | .166    | L Lingual Gyrus                         | .038                      | .230  | .137  |
|                                        | -.007                        | .178  | .107    | Subgenual ACC extending to Caudate      | -.072                     | -.136 | -.114 |
| L Angular Gyrus/Inferior Parietal Lobe | -.234                        | -.054 | -.108   | <b>*R Parahippocampal Gyrus</b>         | .401                      | .078  | .197  |
| R Medial Frontal Gyrus                 | -.269                        | -.015 | -.099   | <b>*Medial Prefrontal Cortex</b>        | -.399                     | .259  | -.062 |
| <b>*L Parahippocampal Gyrus</b>        | <b>-.718**</b>               | -.037 | -.149   | R Anterior Middle Temporal Gyrus        | -.013                     | .124  | .075  |
| L Culmen                               | -.431                        | .093  | -.043   | -                                       |                           |       |       |
| R Culmen                               | -.233                        | -.174 | -.160   | -                                       |                           |       |       |

\*key region interpreted in paper; other regions not consistent with Neurosynth.org brain maps implicated in emotional, memory, social, or self-related processing in the literature.

Note. \*  $p < .05$ , \*\*  $p < .01$ .

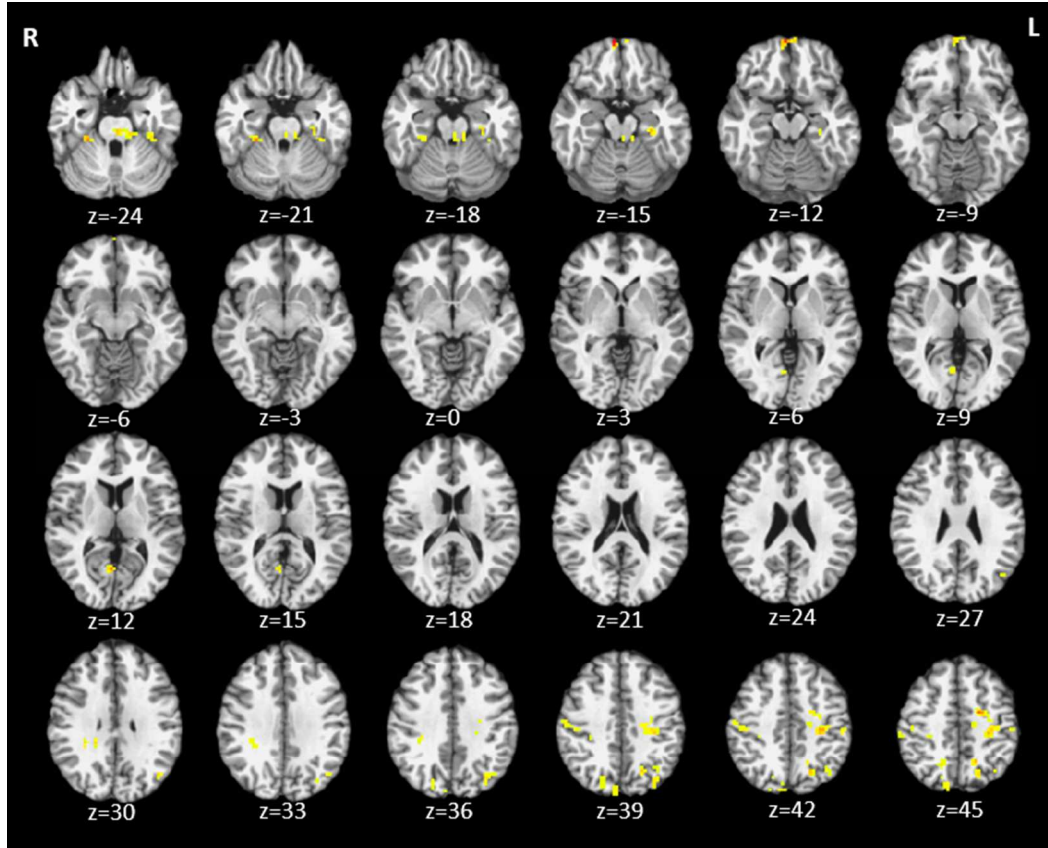

Figure S1. Result of whole-brain voxelwise ANOVA showing significant group (MDD vs. CON)

X condition (criticism vs. neutral) x time interaction effects ( $p < .001$ , 21 voxels contiguity)

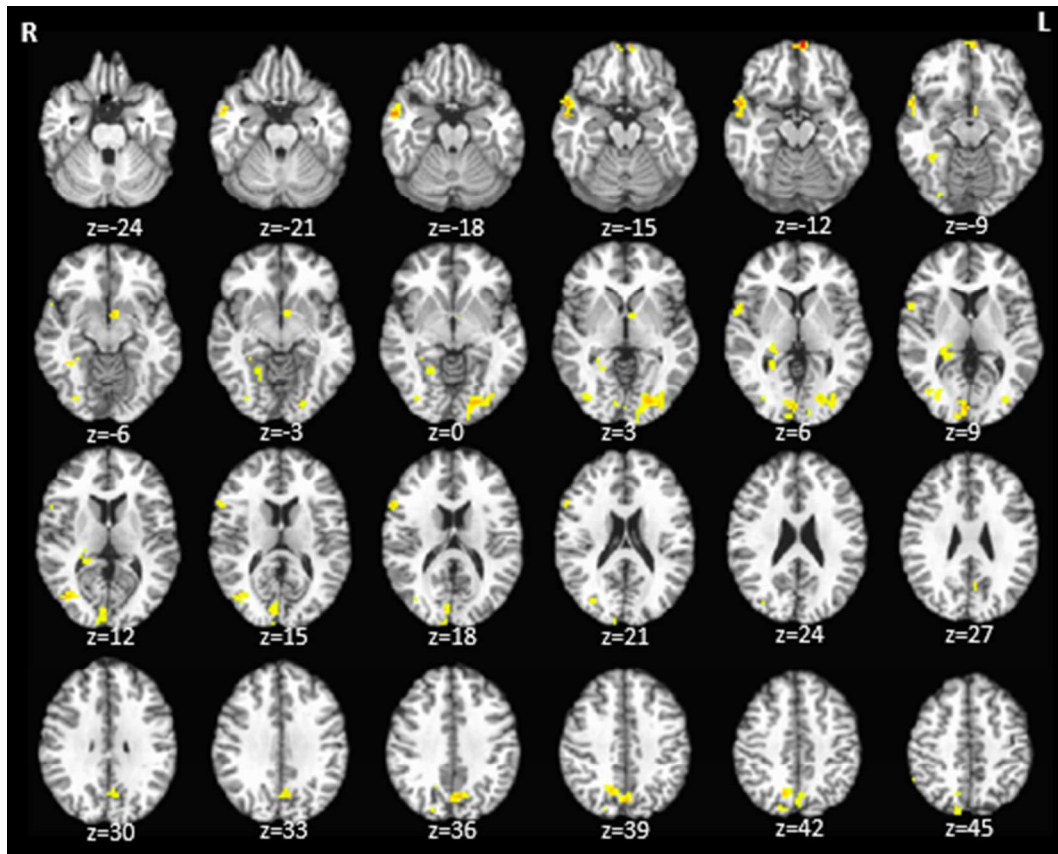

Figure S2. Result of whole-brain voxelwise ANOVA showing significant group (MDD vs. CON) X condition (praise vs. neutral) x time interaction effects ( $p < .001$ , 18 voxels contiguity)

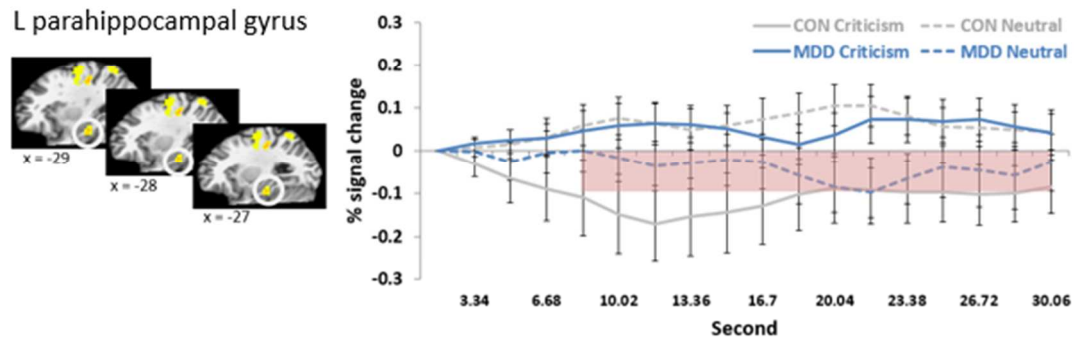

Figure S3. Time-course in the left parahippocampal gyrus showing group X condition X time interaction effects from whole-brain analysis. The temporal regions that displayed significant group (MDD vs. CON) X condition (criticism vs. neutral) interactions are marked below the x axis (pink:  $p < .05$ ).



a. Thalamus/Caudate

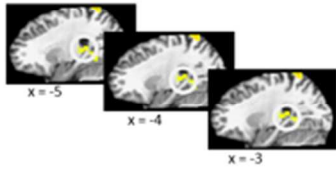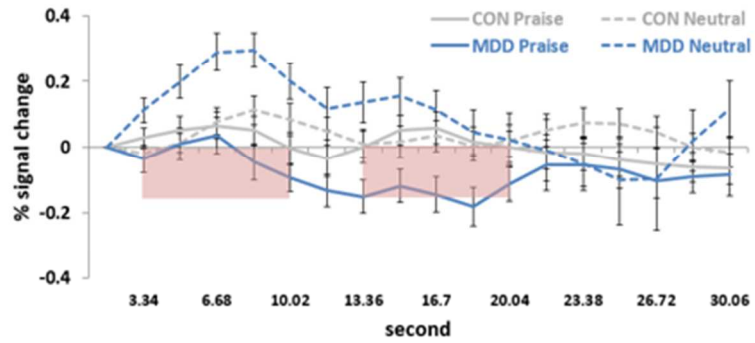

b. R parahippocampal gyrus

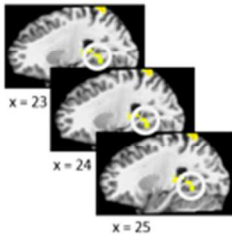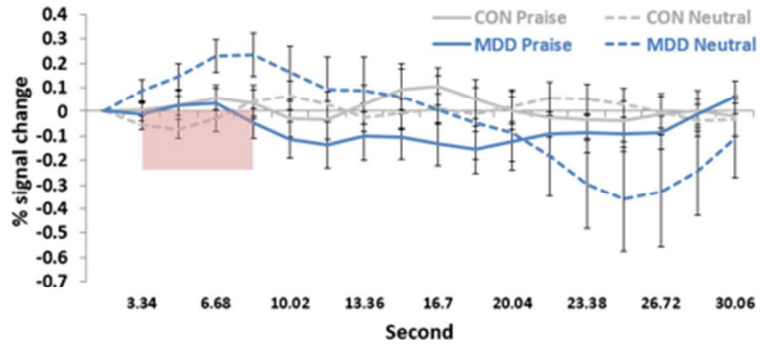

c. VMPFC (BA10/11)

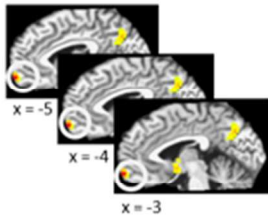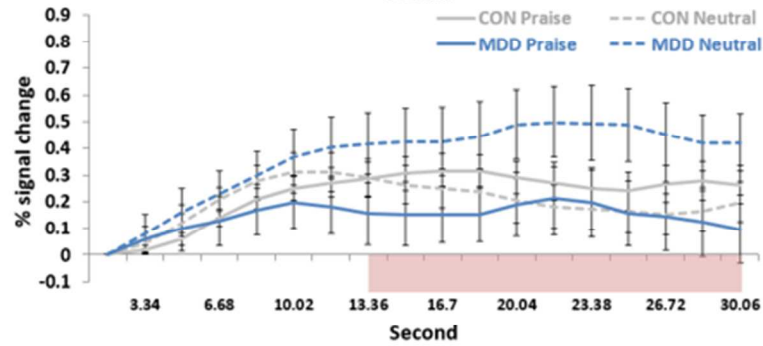

d. Precuneus (BA7)

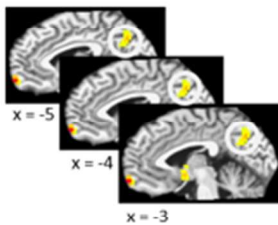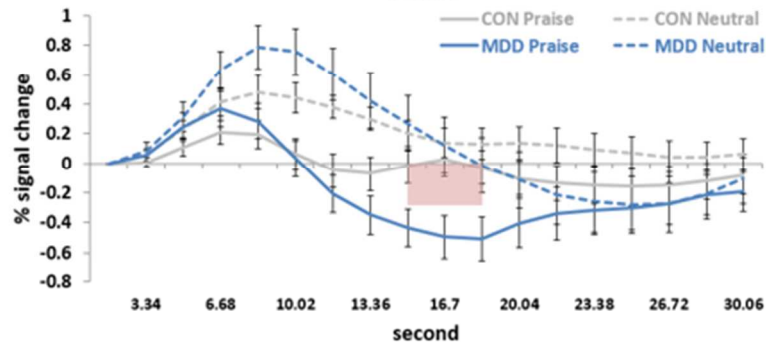

Figure S4. Time-courses in a) the thalamus/caudate, b) right parahippocampal gyrus, c) VMPFC, and d) precuneus showing group X condition X time interaction effects from whole-brain analysis. The temporal regions that displayed significant group (MDD vs. CON) X condition (praise vs. neutral) interactions are marked below the x axis (pink:  $p < .05$ ).
